# Supplementary material for: Heptanoate Improves Compensatory Mechanism of Glucose Homeostasis in Mitochondrial Long-Chain Fatty Acid Oxidation Defect
Source: MDPI journal article supplement (doi:10.3390/nu15214689), 2023-11-05
Supplement: s1 [file s1]

## Supplementary data

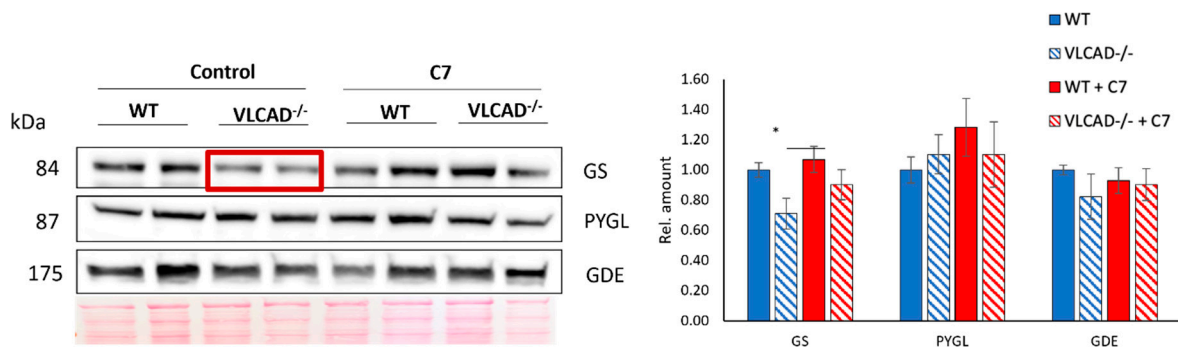

**Figure S1.** VLCAD<sup>-/-</sup> mice affected protein expression of glycogen metabolism.  $n = 10-12$ . Mice groups consisted of both sexes. Significant differences were measured using two-way ANOVA test; \* adjusted  $p$  value ( $q$ ) < 0.05

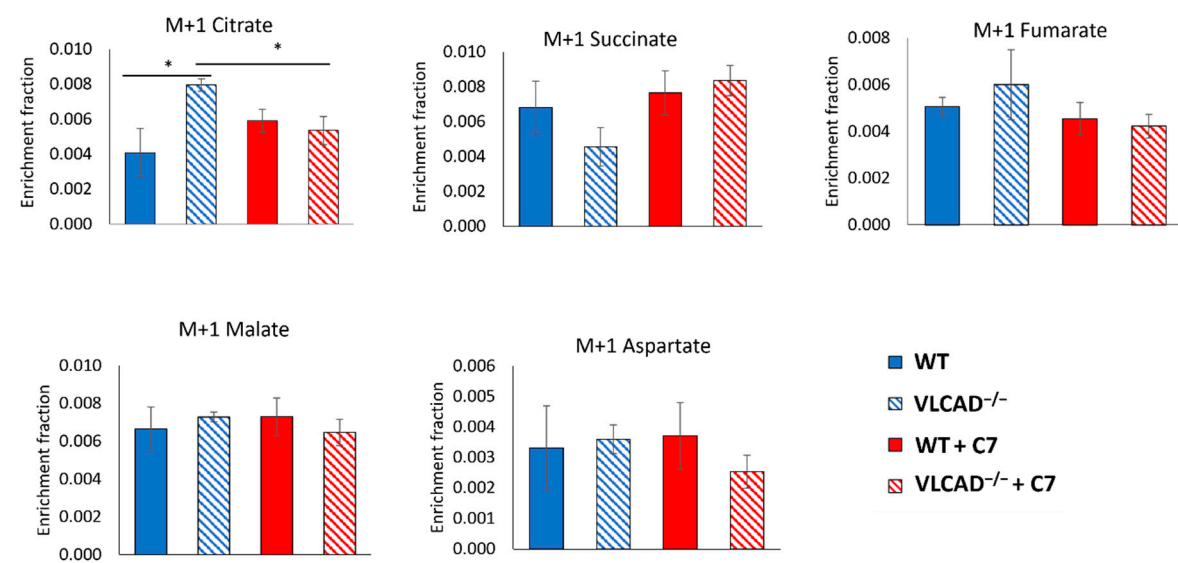

**Figure S2.** The fractional of M+1 enrichment in liver TCA cycle intermediates.  $n = 10-12$ . Mice groups consisted of both sexes. Significant differences were measured using two-way ANOVA test; \* adjusted  $p$  value ( $q$ ) < 0.05.

**Table S1.** The fractional  $^{13}\text{C}$  enrichment in the example metabolite (pyruvate) of unlabeled sample (A) and labeled sample (B) after isotope correction.

**A**

|     | average |                      |       |                          | s.e.m. |                      |         |                           |
|-----|---------|----------------------|-------|--------------------------|--------|----------------------|---------|---------------------------|
|     | WT      | VLCAD <sup>-/-</sup> | WT+C7 | VLCAD <sup>-/-</sup> +C7 | WT     | VLCAD <sup>-/-</sup> | WT + C7 | VLCAD <sup>-/-</sup> + C7 |
| M+0 | 1.000   | 1.000                | 1.000 | 1.000                    | 0.000  | 0.000                | 0.001   | 0.001                     |
| M+1 | 0.000   | 0.000                | 0.000 | 0.000                    | 0.000  | 0.000                | 0.001   | 0.001                     |
| M+2 | 0.000   | 0.000                | 0.000 | 0.000                    | 0.000  | 0.000                | 0.000   | 0.001                     |
| M+3 | 0.000   | 0.000                | 0.000 | 0.000                    | 0.000  | 0.000                | 0.000   | 0.000                     |

**B**

|     | average |                      |       |                          | s.e.m. |                      |       |                          |
|-----|---------|----------------------|-------|--------------------------|--------|----------------------|-------|--------------------------|
|     | WT      | VLCAD <sup>-/-</sup> | WT+C7 | VLCAD <sup>-/-</sup> +C7 | WT     | VLCAD <sup>-/-</sup> | WT+C7 | VLCAD <sup>-/-</sup> +C7 |
| M+0 | 0.996   | 0.995                | 0.996 | 0.996                    | 0.000  | 0.001                | 0.001 | 0.000                    |
| M+1 | 0.002   | 0.001                | 0.001 | 0.002                    | 0.000  | 0.001                | 0.000 | 0.000                    |
| M+2 | 0.001   | 0.001                | 0.001 | 0.001                    | 0.000  | 0.000                | 0.000 | 0.000                    |
| M+3 | 0.002   | 0.004                | 0.003 | 0.002                    | 0.000  | 0.000                | 0.001 | 0.000                    |

**Table S2.** The fractional  $^{13}\text{C}$  enrichment in TCA cycle metabolite: citrate (A), succinate (B), malate (C), and fumarate (D).

**A**

|     | average |       |       |       | s.e.m. |       |       |       |
|-----|---------|-------|-------|-------|--------|-------|-------|-------|
|     | WT      | KO    | C7_WT | C7_KO | WT     | KO    | C7_WT | C7_KO |
| M+0 | 0.993   | 0.988 | 0.992 | 0.992 | 0.001  | 0.001 | 0.001 | 0.001 |
| M+1 | 0.004   | 0.008 | 0.006 | 0.005 | 0.001  | 0.000 | 0.001 | 0.001 |
| M+2 | 0.004   | 0.004 | 0.002 | 0.003 | 0.000  | 0.001 | 0.001 | 0.001 |
| M+3 | 0.000   | 0.001 | 0.001 | 0.001 | 0.000  | 0.000 | 0.000 | 0.000 |
| M+4 | 0.000   | 0.000 | 0.000 | 0.000 | 0.000  | 0.000 | 0.000 | 0.000 |
| M+5 | 0.000   | 0.000 | 0.000 | 0.000 | 0.000  | 0.000 | 0.000 | 0.000 |

**B**

|     | average |       |       |        | s.e.m. |       |       |       |
|-----|---------|-------|-------|--------|--------|-------|-------|-------|
|     | WT      | KO    | C7_WT | C7_KO  | WT     | KO    | C7_WT | C7_KO |
| M+0 | 0.989   | 0.988 | 0.988 | 0.987  | 0.002  | 0.001 | 0.002 | 0.001 |
| M+1 | 0.007   | 0.005 | 0.008 | 0.008  | 0.001  | 0.001 | 0.001 | 0.001 |
| M+2 | 0.003   | 0.007 | 0.004 | 0.006  | 0.001  | 0.001 | 0.001 | 0.001 |
| M+3 | 0.000   | 0.001 | 0.000 | -0.001 | 0.000  | 0.000 | 0.000 | 0.000 |
| M+4 | 0.001   | 0.000 | 0.000 | 0.000  | 0.000  | 0.000 | 0.000 | 0.000 |

**C**

|  | average |    |       |       | s.e.m. |    |       |       |
|--|---------|----|-------|-------|--------|----|-------|-------|
|  | WT      | KO | C7_WT | C7_KO | WT     | KO | C7_WT | C7_KO |
